# Supplementary material for: A superhydrophilic cement-coated mesh: an acid, alkali, and organic reagent-free material for oil/water separation
Source: Royal Society of Chemistry journal article supplement (doi:10.1039/c7nr06756a), 2017-12-20
Supplement: c7nr06756a1.pdf [file c7nr06756a1.pdf]

## Supporting Information

### **Superhydrophilic Cement-Coated Mesh: An Acid, Alkali, and Organic Reagent-Free Material for Oil/Water Separation**

Jinlong Song,<sup>#ab</sup> Shude Li,<sup>#ab</sup> Changlin Zhao,<sup>ab</sup> Yao Lu,<sup>c</sup> Danyang Zhao,<sup>ab</sup> Jing Sun,<sup>\*a</sup> Tamal Roy<sup>d</sup>, Claire J. Carmalt,<sup>e</sup> Xu Deng<sup>f</sup> and Ivan P. Parkin<sup>e</sup>

**Video S1.** The underwater touch and leaving processes of dichloromethane on the superhydrophilic cement-coated meshes. The dichloromethane left the substrate easily, indicating the ultralow stickiness of the meshes to oils.

**Video S2.** The underwater rolling off processes of the oils on the superhydrophilic cement-coated meshes.

**Video S3.** The separation processes of hexane/water mixture driven by gravity. Hexane/water mixture was firstly poured onto the superhydrophilic cement-coated meshes mounted between two acrylic tubes and then separated completely.

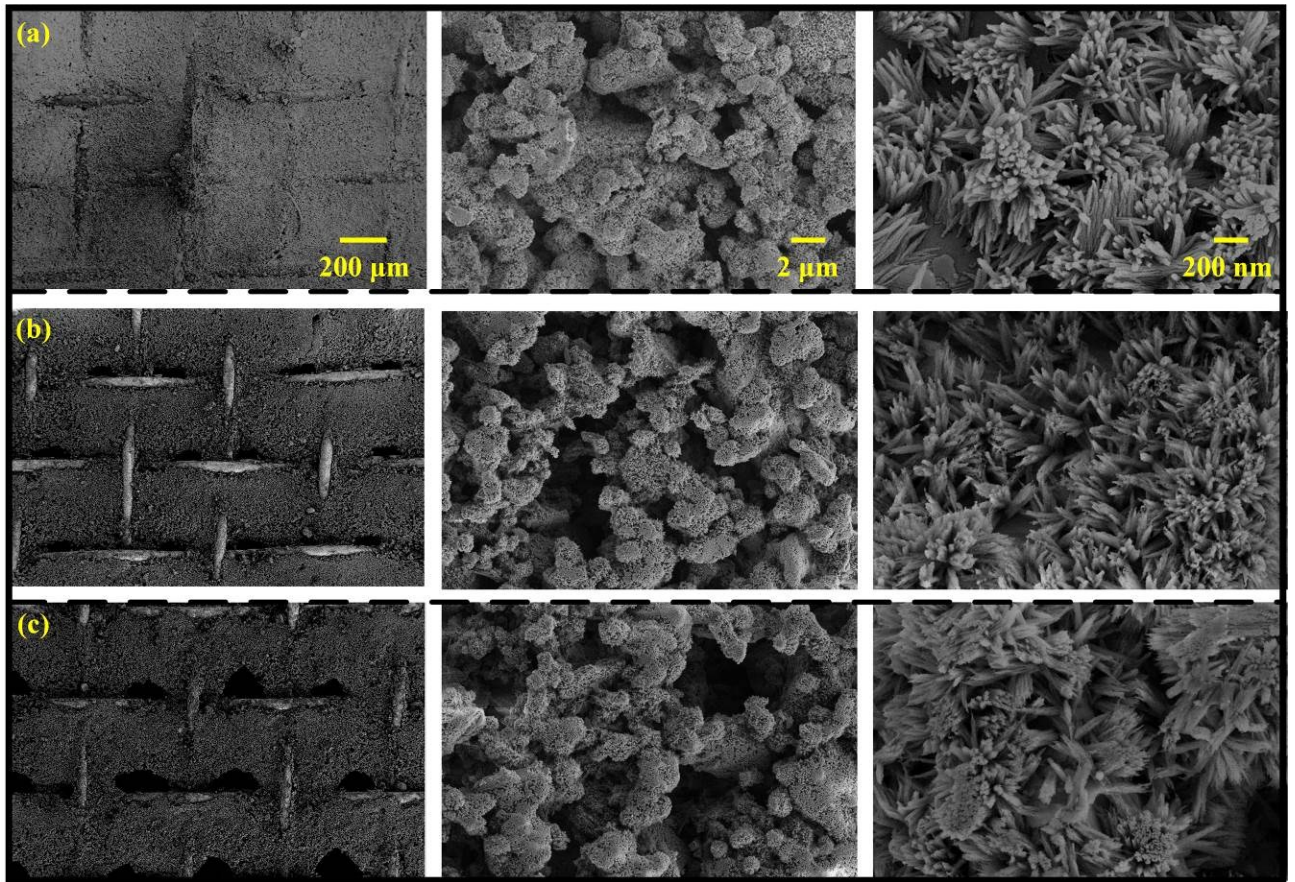

**Figure S1.** Surface micromorphologies of the superhydrophilic cement-coated meshes with different cement masses per unit area: (a) 0.32 kg/m<sup>2</sup>, (b) 0.21 kg/m<sup>2</sup>, (c) 0.13 kg/m<sup>2</sup>.

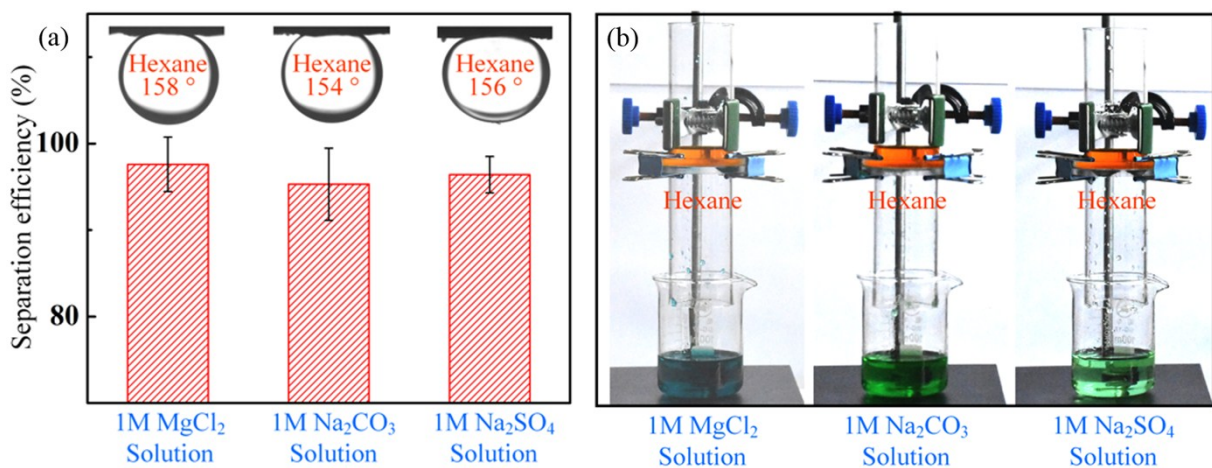

**Figure S2.** Separation of oil/water mixtures containing 1 M aqueous MgCl<sub>2</sub> solution, 1 M aqueous Na<sub>2</sub>CO<sub>3</sub> solution, or 1 M aqueous Na<sub>2</sub>SO<sub>4</sub> solution: (a) CAs of hexane on the superhydrophilic cement-coated meshes under these solutions and the separation efficiency of these mixtures, and (b) the separation processes of these mixtures.

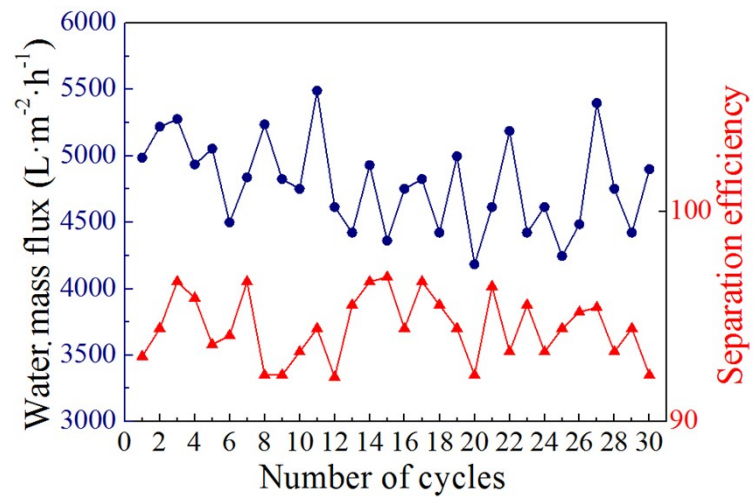

**Figure S3.** The variation of the water mass flux and separation efficiency of the cement-coated meshes with the hexane/1M aqueous NaOH solution.
